# Supplementary material for: Modulating the magnetization dynamics in Ln–Cu-Rad hetero-tri-spin complexes through cis/trans coordination of nitronyl nitroxide radicals around the metal center
Source: Royal Society of Chemistry journal article supplement (doi:10.1039/d1dt00090j), 2021-01-01
Supplement: d1dt00090j1.pdf [file d1dt00090j1.pdf]

## Supporting Information

# Modulating the magnetization dynamics in Ln-Cu-Rad hetero-tri-spin complexes through *cis/trans* coordination of nitronyl nitroxide radicals around metal center

Jiao Lu, Pei Jing, Chaoyi Jin, Junfang Xie and Licun Li\*

*Department of Chemistry, Key Laboratory of Advanced Energy Materials Chemistry, College of Chemistry, Nankai University, Tianjin 300071, China*

\* *Corresponding author. E-mail address: llicun@nankai.edu.cn*

### Contents

|                                                                                                                         |    |
|-------------------------------------------------------------------------------------------------------------------------|----|
| <b>Table S1.</b> Selected bond lengths [Å] and bond angles [°] for <b>1</b> .....                                       | 3  |
| <b>Table S2.</b> Selected bond lengths [Å] and bond angles [°] for <b>2</b> .....                                       | 3  |
| <b>Table S3.</b> Selected bond lengths [Å] and bond angles [°] for <b>3</b> .....                                       | 4  |
| <b>Table S4.</b> Selected bond lengths [Å] and bond angles [°] for <b>4</b> .....                                       | 5  |
| <b>Table S5.</b> Selected bond lengths [Å] and bond angles [°] for <b>5</b> .....                                       | 6  |
| <b>Table S6.</b> SHAPE analysis for the Ln coordination spheres for <b>1</b> and <b>2</b> .....                         | 8  |
| <b>Table S7.</b> SHAPE analysis for the Cu coordination spheres for <b>1</b> and <b>2</b> .....                         | 8  |
| <b>Table S8.</b> SHAPE analysis for the Ln coordination spheres for <b>3–5</b> .....                                    | 8  |
| <b>Table S9.</b> SHAPE analysis for the Cu coordination spheres for <b>3–5</b> .....                                    | 8  |
| <b>Figure S1.</b> The dinuclear structure of <b>1</b> and the coordination polyhedron of Gd in <b>1</b> ...             | 9  |
| <b>Figure S2.</b> Coordination polyhedrons of Cu in <b>1</b> and <b>2</b> .....                                         | 9  |
| <b>Figure S3.</b> Packing diagram of <b>1</b> .....                                                                     | 9  |
| <b>Figure S4.</b> Packing diagram of <b>2</b> .....                                                                     | 9  |
| <b>Figure S5.</b> The asymmetric unit found in complex <b>3</b> and the coordination polyhedron of Gd in <b>3</b> ..... | 10 |

|                                                                                                                         |    |
|-------------------------------------------------------------------------------------------------------------------------|----|
| <b>Figure S6.</b> The asymmetric unit found in complex <b>4</b> and the coordination polyhedron of Tb in <b>4</b> ..... | 10 |
| <b>Figure S7.</b> Coordination polyhedrons of Cu in <b>3–5</b> .....                                                    | 10 |
| <b>Figure S8.</b> 2D structure of complex <b>3</b> .....                                                                | 11 |
| <b>Figure S9.</b> 2D structure of complex <b>4</b> .....                                                                | 11 |
| <b>Figure S10.</b> Powder X-ray diffraction patterns of complexes <b>1</b> and <b>2</b> .....                           | 11 |
| <b>Figure S11.</b> Powder X-ray diffraction patterns of complexes <b>3–5</b> .....                                      | 12 |
| <b>Figure S12.</b> $\chi_{\text{M}}T$ versus $\lg T$ plot for <b>1</b> and <b>2</b> .....                               | 12 |
| <b>Figure S13.</b> $M$ versus $H$ plot for <b>2</b> at 2 K .....                                                        | 12 |
| <b>Scheme S1.</b> Spin polarization mechanism for the magnetic coupling mediated by the $m$ -pyridyl ring .....         | 13 |
| <b>Figure S14.</b> $\chi_{\text{M}}T$ versus $\lg T$ plot for <b>3–5</b> .....                                          | 13 |
| <b>Figure S15.</b> $M$ versus $H$ plot for <b>4</b> at 2 K .....                                                        | 13 |
| <b>Figure S16.</b> $M$ versus $H$ plot for <b>5</b> at 2 K .....                                                        | 13 |
| <b>Figure S17</b> Temperature dependence of $\chi'$ and $\chi''$ for <b>2</b> in zero dc field .....                    | 14 |
| <b>Figure S18.</b> Frequency dependencies of $\chi'$ and $\chi''$ for <b>2</b> in the dc fields of 200–4500 Oe .....    | 14 |
| <b>Figure S19.</b> The $\tau$ versus $H$ plots for <b>2</b> at 2 K under applied dc fields .....                        | 14 |
| <b>Figure S20.</b> Temperature dependence of $\chi'$ and $\chi''$ for <b>4</b> in zero dc field .....                   | 15 |
| <b>Figure S21.</b> Temperature dependence of $\chi'$ and $\chi''$ for <b>5</b> in zero dc field .....                   | 15 |
| <b>Figure S22.</b> Temperature dependence of $\chi'$ and $\chi''$ for <b>5</b> in 3000 Oe dc field .....                | 15 |

**Table S1.** Selected bond lengths [ $\text{\AA}$ ] and angles [ $^\circ$ ] for **1**.

| <i>Bond distances</i> |            |                   |            |
|-----------------------|------------|-------------------|------------|
| Gd(1)-O(5)            | 2.364(5)   | Cu(1)-O(13)       | 2.348(5)   |
| Gd(1)-O(10)           | 2.455(6)   | Cu(1)-O(12)       | 2.279(5)   |
| Gd(1)-O(2)            | 2.366(5)   | Cu(1)-O(11)       | 1.974(5)   |
| Gd(1)-O(4)            | 2.370(5)   | Cu(1)-N(5)        | 2.014(6)   |
| Gd(1)-O(9)            | 2.374(5)   | Cu(1)-N(6)        | 2.019(6)   |
| Gd(1)-O(8)            | 2.422(6)   | O(2)-N(2)         | 1.319(9)   |
| Gd(1)-O(6)            | 2.381(5)   | O(3)-N(3)         | 1.270(10)  |
| Gd(1)-O(7)            | 2.341(5)   | O(4)-N(4)         | 1.310(8)   |
| Cu(1)-O(14)           | 1.974(5)   | O(1)-N(1)         | 1.275(9)   |
| <i>Angles</i>         |            |                   |            |
| O(5)-Gd(1)-O(10)      | 69.7(2)    | O(7)-Gd(1)-O(2)   | 145.7(2)   |
| O(5)-Gd(1)-O(2)       | 82.91(18)  | O(7)-Gd(1)-O(4)   | 144.9(2)   |
| O(5)-Gd(1)-O(4)       | 120.36(18) | O(7)-Gd(1)-O(9)   | 83.93(19)  |
| O(5)-Gd(1)-O(9)       | 138.8(2)   | O(7)-Gd(1)-O(8)   | 71.2(2)    |
| O(5)-Gd(1)-O(8)       | 134.41(19) | O(7)-Gd(1)-O(6)   | 76.35(19)  |
| O(5)-Gd(1)-O(6)       | 70.5(2)    | O(14)-Cu(1)-O(13) | 85.12(19)  |
| O(2)-Gd(1)-O(10)      | 74.88(19)  | O(14)-Cu(1)-O(12) | 86.9(2)    |
| O(2)-Gd(1)-O(4)       | 69.40(19)  | O(14)-Cu(1)-N(5)  | 175.8(2)   |
| O(2)-Gd(1)-O(9)       | 92.50(18)  | O(14)-Cu(1)-N(6)  | 87.3(2)    |
| O(2)-Gd(1)-O(8)       | 139.08(18) | O(12)-Cu(1)-O(13) | 166.93(18) |
| O(2)-Gd(1)-O(6)       | 123.10(19) | O(11)-Cu(1)-O(14) | 87.6(2)    |
| O(4)-Gd(1)-O(10)      | 140.57(18) | O(11)-Cu(1)-O(13) | 84.6(2)    |
| O(4)-Gd(1)-O(9)       | 95.48(18)  | O(11)-Cu(1)-O(12) | 84.8(2)    |
| O(4)-Gd(1)-O(8)       | 75.52(19)  | O(11)-Cu(1)-N(5)  | 89.0(2)    |
| O(4)-Gd(1)-O(6)       | 82.07(17)  | O(11)-Cu(1)-N(6)  | 174.7(2)   |
| O(9)-Gd(1)-O(10)      | 69.6(2)    | N(5)-Cu(1)-O(13)  | 92.1(2)    |
| O(9)-Gd(1)-O(8)       | 70.2(2)    | N(5)-Cu(1)-O(12)  | 95.2(2)    |
| O(9)-Gd(1)-O(6)       | 139.7(2)   | N(5)-Cu(1)-N(6)   | 96.0(2)    |
| O(8)-Gd(1)-O(10)      | 127.3(2)   | N(6)-Cu(1)-O(13)  | 93.2(2)    |
| O(6)-Gd(1)-O(10)      | 133.04(18) | N(6)-Cu(1)-O(12)  | 96.8(2)    |
| O(6)-Gd(1)-O(8)       | 70.24(19)  | N(2)-O(2)-Gd(1)   | 131.9(4)   |
| O(7)-Gd(1)-O(5)       | 77.8(2)    | N(4)-O(4)-Gd(1)   | 133.8(4)   |
| O(7)-Gd(1)-O(10)      | 71.9(2)    |                   |            |

**Table S2.** Selected bond lengths [ $\text{\AA}$ ] and angles [ $^\circ$ ] for **2**.

| <i>Bond distances</i> |          |             |           |
|-----------------------|----------|-------------|-----------|
| Dy(1)-O(5)            | 2.329(7) | Cu(1)-O(13) | 2.344(6)  |
| Dy(1)-O(10)           | 2.452(8) | Cu(1)-O(12) | 2.282(6)  |
| Dy(1)-O(2)            | 2.340(7) | Cu(1)-O(11) | 1.971(7)  |
| Dy(1)-O(4)            | 2.354(6) | Cu(1)-N(5)  | 2.015(8)  |
| Dy(1)-O(9)            | 2.338(6) | Cu(1)-N(6)  | 2.013(8)  |
| Dy(1)-O(8)            | 2.414(8) | O(2)-N(2)   | 1.322(11) |

|                  |          |                   |           |
|------------------|----------|-------------------|-----------|
| Dy(1)-O(6)       | 2.350(7) | O(3)-N(3)         | 1.261(12) |
| Dy(1)-O(7)       | 2.323(7) | O(4)-N(4)         | 1.295(11) |
| Cu(1)-O(14)      | 1.977(7) | O(1)-N(1)         | 1.279(12) |
| <i>Angles</i>    |          |                   |           |
| O(5)-Dy(1)-O(10) | 69.9(3)  | O(7)-Dy(1)-O(2)   | 146.5(3)  |
| O(5)-Dy(1)-O(2)  | 82.6(2)  | O(7)-Dy(1)-O(4)   | 144.7(3)  |
| O(5)-Dy(1)-O(4)  | 119.6(2) | O(7)-Dy(1)-O(9)   | 84.5(2)   |
| O(5)-Dy(1)-O(9)  | 138.8(3) | O(7)-Dy(1)-O(8)   | 71.3(3)   |
| O(5)-Dy(1)-O(8)  | 134.7(2) | O(7)-Dy(1)-O(6)   | 76.7(2)   |
| O(5)-Dy(1)-O(6)  | 70.5(3)  | O(14)-Cu(1)-O(13) | 85.0(3)   |
| O(2)-Dy(1)-O(10) | 75.2(3)  | O(14)-Cu(1)-O(12) | 87.6(3)   |
| O(2)-Dy(1)-O(4)  | 68.9(2)  | O(14)-Cu(1)-N(5)  | 175.4(3)  |
| O(2)-Dy(1)-O(8)  | 138.6(2) | O(14)-Cu(1)-N(6)  | 87.2(3)   |
| O(2)-Dy(1)-O(6)  | 122.2(2) | O(12)-Cu(1)-O(13) | 167.4(2)  |
| O(4)-Dy(1)-O(10) | 140.5(3) | O(11)-Cu(1)-O(14) | 87.9(3)   |
| O(4)-Dy(1)-O(8)  | 75.4(2)  | O(11)-Cu(1)-O(13) | 84.9(3)   |
| O(9)-Dy(1)-O(10) | 69.3(3)  | O(11)-Cu(1)-O(12) | 84.7(3)   |
| O(9)-Dy(1)-O(2)  | 92.1(2)  | O(11)-Cu(1)-N(5)  | 88.5(3)   |
| O(9)-Dy(1)-O(4)  | 95.7(2)  | O(11)-Cu(1)-N(6)  | 174.8(3)  |
| O(9)-Dy(1)-O(8)  | 70.9(3)  | N(5)-Cu(1)-O(13)  | 91.8(3)   |
| O(9)-Dy(1)-O(6)  | 140.6(3) | N(5)-Cu(1)-O(12)  | 94.9(3)   |
| O(8)-Dy(1)-O(10) | 127.7(3) | N(6)-Cu(1)-O(13)  | 93.0(3)   |
| O(6)-Dy(1)-O(10) | 133.5(2) | N(6)-Cu(1)-O(12)  | 96.8(3)   |
| O(6)-Dy(1)-O(4)  | 81.3(2)  | N(6)-Cu(1)-N(5)   | 96.3(3)   |
| O(6)-Dy(1)-O(8)  | 70.4(2)  | N(2)-O(2)-Dy(1)   | 131.4(5)  |
| O(7)-Dy(1)-O(5)  | 78.4(3)  | N(4)-O(4)-Dy(1)   | 134.2(6)  |
| O(7)-Dy(1)-O(10) | 72.4(3)  |                   |           |

**Table S3.** Selected bond lengths [Å] and angles [°] for **3**.

|                       |           |                 |          |
|-----------------------|-----------|-----------------|----------|
| <i>Bond distances</i> |           |                 |          |
| Gd(1)-O(18)           | 2.392(5)  | Cu(2)-N(8)#1    | 2.001(6) |
| Gd(1)-O(10)           | 2.384(5)  | Cu(1)-O(4)      | 1.947(5) |
| Gd(1)-O(17)           | 2.411(5)  | Cu(1)-O(2)      | 1.950(5) |
| Gd(1)-O(12)           | 2.372(5)  | Cu(1)-N(3)      | 2.145(6) |
| Gd(1)-O(13)           | 2.404(6)  | Cu(1)-O(3)      | 2.266(6) |
| Gd(1)-O(15)           | 2.400(5)  | Cu(1)-O(1)      | 2.021(6) |
| Gd(1)-O(14)           | 2.375(5)  | Cu(1)-N(7)#2    | 2.407(6) |
| Gd(1)-O(16)           | 2.377(5)  | N(2)-O(10)      | 1.306(8) |
| Cu(2)-O(6)            | 2.018(6)  | O(12)-N(6)      | 1.312(8) |
| Cu(2)-O(5)            | 2.279(6)  | N(5)-O(11)      | 1.286(8) |
| Cu(2)-O(8)            | 2.029(5)  | O(9)-N(1)       | 1.276(8) |
| Cu(2)-O(7)            | 2.273(6)  | N(8)-Cu(2)#3    | 2.001(6) |
| Cu(2)-N(4)            | 2.006(6)  | N(7)-Cu(1)#4    | 2.407(6) |
| <i>Angles</i>         |           |                 |          |
| O(18)-Gd(1)-O(17)     | 73.71(18) | O(6)-Cu(2)-O(7) | 92.5(2)  |

|                   |            |                   |          |
|-------------------|------------|-------------------|----------|
| O(18)-Gd(1)-O(13) | 128.78(18) | O(8)-Cu(2)-O(5)   | 93.0(2)  |
| O(18)-Gd(1)-O(15) | 129.28(19) | O(8)-Cu(2)-O(7)   | 87.1(2)  |
| O(10)-Gd(1)-O(18) | 74.46(17)  | O(7)-Cu(2)-O(5)   | 179.7(2) |
| O(10)-Gd(1)-O(17) | 72.74(18)  | N(4)-Cu(2)-O(6)   | 90.7(2)  |
| O(10)-Gd(1)-O(13) | 148.87(19) | N(4)-Cu(2)-O(5)   | 89.8(2)  |
| O(10)-Gd(1)-O(15) | 72.17(18)  | N(4)-Cu(2)-O(8)   | 89.9(2)  |
| O(12)-Gd(1)-O(18) | 71.82(18)  | N(4)-Cu(2)-O(7)   | 90.5(2)  |
| O(12)-Gd(1)-O(10) | 138.85(19) | N(8)#1-Cu(2)-O(6) | 89.9(2)  |
| O(12)-Gd(1)-O(17) | 75.69(18)  | N(8)#1-Cu(2)-O(5) | 89.6(2)  |
| O(12)-Gd(1)-O(13) | 72.27(19)  | N(8)#1-Cu(2)-O(8) | 89.6(2)  |
| O(12)-Gd(1)-O(15) | 148.89(19) | N(8)#1-Cu(2)-O(7) | 90.1(2)  |
| O(12)-Gd(1)-O(14) | 95.76(19)  | N(8)#1-Cu(2)-N(4) | 179.2(3) |
| O(12)-Gd(1)-O(16) | 99.37(18)  | O(4)-Cu(1)-O(2)   | 177.7(2) |
| O(13)-Gd(1)-O(17) | 129.11(19) | O(4)-Cu(1)-N(3)   | 92.5(2)  |
| O(15)-Gd(1)-O(17) | 128.28(18) | O(4)-Cu(1)-O(3)   | 86.6(2)  |
| O(15)-Gd(1)-O(13) | 76.72(19)  | O(4)-Cu(1)-O(1)   | 90.4(2)  |
| O(14)-Gd(1)-O(18) | 75.87(18)  | O(4)-Cu(1)-N(7)#2 | 82.7(2)  |
| O(14)-Gd(1)-O(10) | 98.22(19)  | O(2)-Cu(1)-N(3)   | 86.6(2)  |
| O(14)-Gd(1)-O(17) | 149.56(19) | O(2)-Cu(1)-O(3)   | 95.6(2)  |
| O(14)-Gd(1)-O(13) | 72.7(2)    | O(2)-Cu(1)-O(1)   | 90.2(2)  |
| O(14)-Gd(1)-O(15) | 72.42(19)  | O(2)-Cu(1)-N(7)#2 | 95.1(2)  |
| O(14)-Gd(1)-O(16) | 134.59(19) | N(3)-Cu(1)-O(3)   | 96.4(2)  |
| O(16)-Gd(1)-O(18) | 149.53(18) | N(3)-Cu(1)-N(7)#2 | 82.1(2)  |
| O(16)-Gd(1)-O(10) | 97.81(18)  | O(3)-Cu(1)-N(7)#2 | 169.1(2) |
| O(16)-Gd(1)-O(17) | 75.85(18)  | O(1)-Cu(1)-N(3)   | 171.0(3) |
| O(16)-Gd(1)-O(13) | 71.69(19)  | O(1)-Cu(1)-O(3)   | 92.3(3)  |
| O(16)-Gd(1)-O(15) | 72.67(19)  | O(1)-Cu(1)-N(7)#2 | 89.7(3)  |
| O(6)-Cu(2)-O(5)   | 87.4(2)    | N(2)-O(10)-Gd(1)  | 138.3(4) |
| O(6)-Cu(2)-O(8)   | 179.3(2)   | N(6)-O(12)-Gd(1)  | 137.3(5) |

#1 x-1, -y+1/2, z-1/2      #2 x-1, y, z

#3 x+1, -y+1/2, z+1/2      #4 x+1, y, z

**Table S4.** Selected bond lengths [Å] and angles [°] for **4**.

| Bond distances |          |              |           |
|----------------|----------|--------------|-----------|
| Tb(1)-O(18)    | 2.367(6) | Cu(2)-N(8)#1 | 1.993(7)  |
| Tb(1)-O(10)    | 2.366(6) | Cu(1)-O(4)   | 1.938(6)  |
| Tb(1)-O(17)    | 2.382(6) | Cu(1)-O(2)   | 1.944(6)  |
| Tb(1)-O(12)    | 2.348(6) | Cu(1)-N(3)   | 2.132(7)  |
| Tb(1)-O(13)    | 2.380(6) | Cu(1)-O(3)   | 2.252(7)  |
| Tb(1)-O(15)    | 2.365(6) | Cu(1)-O(1)   | 2.009(7)  |
| Tb(1)-O(14)    | 2.355(6) | Cu(1)-N(7)#2 | 2.393(8)  |
| Tb(1)-O(16)    | 2.353(6) | N(2)-O(10)   | 1.301(8)  |
| Cu(2)-O(6)     | 1.996(6) | O(12)-N(6)   | 1.306(8)  |
| Cu(2)-O(5)     | 2.272(7) | N(5)-O(11)   | 1.289(10) |

|                   |                       |                   |          |
|-------------------|-----------------------|-------------------|----------|
| Cu(2)-O(8)        | 2.023(6)              | O(9)-N(1)         | 1.281(9) |
| Cu(2)-O(7)        | 2.258(7)              | N(8)-Cu(2)#3      | 1.993(7) |
| Cu(2)-N(4)        | 1.996(7)              | N(7)-Cu(1)#4      | 2.393(8) |
| <b>Angles</b>     |                       |                   |          |
| O(18)-Tb(1)-O(10) | 74.6(2)               | O(6)-Cu(2)-O(7)   | 92.3(3)  |
| O(18)-Tb(1)-O(17) | 73.4(2)               | O(6)-Cu(2)-N(4)   | 91.0(3)  |
| O(18)-Tb(1)-O(13) | 128.8(2)              | O(8)-Cu(2)-O(5)   | 92.9(3)  |
| O(10)-Tb(1)-O(17) | 72.4(2)               | O(8)-Cu(2)-O(7)   | 87.2(3)  |
| O(10)-Tb(1)-O(13) | 148.6(2)              | O(7)-Cu(2)-O(5)   | 179.8(3) |
| O(12)-Tb(1)-O(18) | 71.2(2)               | N(4)-Cu(2)-O(5)   | 90.2(3)  |
| O(12)-Tb(1)-O(10) | 138.2(2)              | N(4)-Cu(2)-O(8)   | 89.9(3)  |
| O(12)-Tb(1)-O(17) | 75.4(2)               | N(4)-Cu(2)-O(7)   | 90.0(3)  |
| O(12)-Tb(1)-O(13) | 73.1(2)               | N(8)#1-Cu(2)-O(6) | 89.8(3)  |
| O(12)-Tb(1)-O(15) | 148.9(2)              | N(8)#1-Cu(2)-O(5) | 88.8(3)  |
| O(12)-Tb(1)-O(14) | 96.1(2)               | N(8)#1-Cu(2)-O(8) | 89.4(3)  |
| O(12)-Tb(1)-O(16) | 99.4(2)               | N(8)#1-Cu(2)-O(7) | 91.0(3)  |
| O(13)-Tb(1)-O(17) | 129.7(2)              | N(8)#1-Cu(2)-N(4) | 178.7(3) |
| O(15)-Tb(1)-O(18) | 129.9(2)              | O(4)-Cu(1)-O(2)   | 177.8(3) |
| O(15)-Tb(1)-O(10) | 72.8(2)               | O(4)-Cu(1)-N(3)   | 92.1(3)  |
| O(15)-Tb(1)-O(17) | 128.6(2)              | O(4)-Cu(1)-O(3)   | 86.7(3)  |
| O(15)-Tb(1)-O(13) | 75.9(2)               | O(4)-Cu(1)-O(1)   | 90.8(3)  |
| O(14)-Tb(1)-O(18) | 76.0(2)               | O(4)-Cu(1)-N(7)#2 | 82.3(3)  |
| O(14)-Tb(1)-O(10) | 98.2(2)               | O(2)-Cu(1)-N(3)   | 87.1(3)  |
| O(14)-Tb(1)-O(17) | 149.4(2)              | O(2)-Cu(1)-O(3)   | 95.4(3)  |
| O(14)-Tb(1)-O(13) | 72.6(2)               | O(2)-Cu(1)-O(1)   | 89.7(3)  |
| O(14)-Tb(1)-O(15) | 72.2(2)               | O(2)-Cu(1)-N(7)#2 | 95.5(3)  |
| O(16)-Tb(1)-O(18) | 149.3(2)              | N(3)-Cu(1)-O(3)   | 96.4(3)  |
| O(16)-Tb(1)-O(10) | 97.9(2)               | N(3)-Cu(1)-N(7)#2 | 82.1(3)  |
| O(16)-Tb(1)-O(17) | 75.9(2)               | O(3)-Cu(1)-N(7)#2 | 168.9(3) |
| O(16)-Tb(1)-O(13) | 71.7(2)               | O(1)-Cu(1)-N(3)   | 171.4(3) |
| O(16)-Tb(1)-O(15) | 72.7(2)               | O(1)-Cu(1)-O(3)   | 91.9(3)  |
| O(16)-Tb(1)-O(14) | 134.6(2)              | O(1)-Cu(1)-N(7)#2 | 90.2(3)  |
| O(6)-Cu(2)-O(5)   | 87.6(3)               | N(2)-O(10)-Tb(1)  | 137.2(5) |
| O(6)-Cu(2)-O(8)   | 179.0(3)              | N(6)-O(12)-Tb(1)  | 136.6(5) |
|                   | #1 x-1, -y+1/2, z-1/2 | #2 x-1, y, z      |          |
|                   | #3 x+1, -y+1/2, z+1/2 | #4 x+1, y, z      |          |

**Table S5.** Selected bond lengths [Å] and angles [°] for **5**.

| <i>Bond distances</i> |          |              |          |
|-----------------------|----------|--------------|----------|
| Dy(1)-O(18)           | 2.356(5) | Cu(2)-N(8)#1 | 1.984(6) |
| Dy(1)-O(10)           | 2.356(5) | Cu(1)-O(4)   | 1.939(5) |
| Dy(1)-O(17)           | 2.386(5) | Cu(1)-O(2)   | 1.936(5) |
| Dy(1)-O(12)           | 2.346(5) | Cu(1)-N(3)   | 2.132(6) |
| Dy(1)-O(13)           | 2.373(6) | Cu(1)-O(3)   | 2.258(6) |

|                       |            |                   |          |
|-----------------------|------------|-------------------|----------|
| Dy(1)-O(15)           | 2.358(5)   | Cu(1)-O(1)        | 2.017(6) |
| Dy(1)-O(14)           | 2.341(5)   | Cu(1)-N(7)#2      | 2.409(6) |
| Dy(1)-O(16)           | 2.340(5)   | N(2)-O(10)        | 1.286(8) |
| Cu(2)-O(6)            | 2.005(5)   | O(12)-N(6)        | 1.304(8) |
| Cu(2)-O(5)            | 2.270(6)   | N(5)-O(11)        | 1.279(9) |
| Cu(2)-O(8)            | 2.015(6)   | O(9)-N(1)         | 1.281(8) |
| Cu(2)-O(7)            | 2.262(7)   | N(8)-Cu(2)#3      | 1.984(6) |
| Cu(2)-N(4)            | 1.995(6)   | N(7)-Cu(1)#4      | 2.409(6) |
| <i>Angles</i>         |            |                   |          |
| O(18)-Dy(1)-O(10)     | 74.89(17)  | O(6)-Cu(2)-O(7)   | 92.3(2)  |
| O(18)-Dy(1)-O(17)     | 74.16(18)  | O(8)-Cu(2)-O(5)   | 93.1(2)  |
| O(18)-Dy(1)-O(13)     | 128.82(18) | O(8)-Cu(2)-O(7)   | 87.1(2)  |
| O(18)-Dy(1)-O(15)     | 129.72(19) | O(7)-Cu(2)-O(5)   | 179.8(2) |
| O(10)-Dy(1)-O(17)     | 73.01(18)  | N(4)-Cu(2)-O(6)   | 90.7(2)  |
| O(10)-Dy(1)-O(13)     | 148.03(19) | N(4)-Cu(2)-O(5)   | 90.4(2)  |
| O(10)-Dy(1)-O(15)     | 72.26(19)  | N(4)-Cu(2)-O(8)   | 89.8(2)  |
| O(12)-Dy(1)-O(18)     | 71.64(18)  | N(4)-Cu(2)-O(7)   | 89.8(2)  |
| O(12)-Dy(1)-O(10)     | 138.95(19) | N(8)#1-Cu(2)-O(6) | 89.8(2)  |
| O(12)-Dy(1)-O(17)     | 75.52(18)  | N(8)#1-Cu(2)-O(5) | 88.9(2)  |
| O(12)-Dy(1)-O(13)     | 73.01(19)  | N(8)#1-Cu(2)-O(8) | 89.7(2)  |
| O(12)-Dy(1)-O(15)     | 148.72(19) | N(8)#1-Cu(2)-O(7) | 91.0(3)  |
| O(13)-Dy(1)-O(17)     | 129.38(19) | N(8)#1-Cu(2)-N(4) | 179.1(3) |
| O(15)-Dy(1)-O(17)     | 128.18(17) | O(4)-Cu(1)-N(3)   | 92.7(2)  |
| O(15)-Dy(1)-O(13)     | 75.8(2)    | O(4)-Cu(1)-O(3)   | 86.7(2)  |
| O(14)-Dy(1)-O(18)     | 75.34(18)  | O(4)-Cu(1)-O(1)   | 90.4(2)  |
| O(14)-Dy(1)-O(10)     | 97.63(19)  | O(4)-Cu(1)-N(7)#2 | 82.5(2)  |
| O(14)-Dy(1)-O(17)     | 149.47(18) | O(2)-Cu(1)-O(4)   | 178.1(2) |
| O(14)-Dy(1)-O(12)     | 96.23(18)  | O(2)-Cu(1)-N(3)   | 86.2(2)  |
| O(14)-Dy(1)-O(13)     | 73.0(2)    | O(2)-Cu(1)-O(3)   | 95.1(2)  |
| O(14)-Dy(1)-O(15)     | 72.56(18)  | O(2)-Cu(1)-O(1)   | 90.4(2)  |
| O(16)-Dy(1)-O(18)     | 149.06(18) | O(2)-Cu(1)-N(7)#2 | 95.7(2)  |
| O(16)-Dy(1)-O(10)     | 98.11(18)  | N(3)-Cu(1)-O(3)   | 97.1(2)  |
| O(16)-Dy(1)-O(17)     | 74.98(18)  | N(3)-Cu(1)-N(7)#2 | 81.8(2)  |
| O(16)-Dy(1)-O(12)     | 98.50(18)  | O(3)-Cu(1)-N(7)#2 | 169.0(2) |
| O(16)-Dy(1)-O(13)     | 71.72(19)  | O(1)-Cu(1)-N(3)   | 170.5(2) |
| O(16)-Dy(1)-O(15)     | 73.23(19)  | O(1)-Cu(1)-O(3)   | 92.1(2)  |
| O(16)-Dy(1)-O(14)     | 135.55(19) | O(1)-Cu(1)-N(7)#2 | 89.7(2)  |
| O(6)-Cu(2)-O(5)       | 87.5(2)    | N(2)-O(10)-Dy(1)  | 138.9(4) |
| O(6)-Cu(2)-O(8)       | 179.2(2)   | N(6)-O(12)-Dy(1)  | 136.8(4) |
| #1 x-1, -y+1/2, z-1/2 |            | #2 x-1, y, z      |          |
| #3 x+1, -y+1/2, z+1/2 |            | #4 x+1, y, z      |          |

**Table S6.** SHAPE analysis for the Ln coordination spheres for **1** and **2**.

| <b>Complex</b> | <b>BTPR-8</b> | JBTPR-8 | TDD-8 | SAPR-8 |
|----------------|---------------|---------|-------|--------|
| <b>1 Gd</b>    | <b>0.945</b>  | 1.648   | 2.144 | 2.678  |
| <b>2 Dy</b>    | <b>1.003</b>  | 1.586   | 2.072 | 2.623  |

BTPR-8: Biaugmented trigonal prism; JBTPR-8: Biaugmented trigonal prism J50; TDD-8: Triangular dodecahedron; SAPR-8: Square antiprism.

**Table S7.** SHAPE analysis for the Cu coordination spheres for **1** and **2**.

| <b>Complex</b> | <b>OC-6</b>  | TPR-6  | PPY-6  |
|----------------|--------------|--------|--------|
| <b>1 Gd</b>    | <b>0.861</b> | 15.503 | 28.278 |
| <b>2 Dy</b>    | <b>0.850</b> | 15.559 | 28.354 |

OC-6: Octahedron; TPR-6: Trigonal prism; PPY-6: Pentagonal pyramid.

**Table S8.** SHAPE analysis for the Ln coordination spheres for **3–5**.

| <b>Complex</b> | <b>TDD-8</b> | BTPR-8 | SAPR-8 | JSD-8 |
|----------------|--------------|--------|--------|-------|
| <b>3 Gd</b>    | <b>0.073</b> | 2.747  | 2.802  | 2.943 |
| <b>4 Tb</b>    | <b>0.068</b> | 2.754  | 2.838  | 2.951 |
| <b>5 Dy</b>    | <b>0.052</b> | 2.727  | 2.908  | 2.904 |

TDD-8: Triangular dodecahedron; BTPR-8: Biaugmented trigonal prism; SAPR-8: Square antiprism; JSD-8: Snub diphenoid J84.

**Table S9.** SHAPE analysis for the Cu coordination spheres for **3–5**.

| <b>Complex</b> | <b>OC-6</b> | TPR-6        | PPY-6  |
|----------------|-------------|--------------|--------|
| <b>3 Gd</b>    | <b>Cu1</b>  | <b>1.027</b> | 14.395 |
|                | <b>Cu2</b>  | <b>0.388</b> | 16.455 |
| <b>4 Tb</b>    | <b>Cu1</b>  | <b>1.024</b> | 14.291 |
|                | <b>Cu2</b>  | <b>0.396</b> | 16.275 |
| <b>5 Dy</b>    | <b>Cu1</b>  | <b>1.093</b> | 14.182 |
|                | <b>Cu2</b>  | <b>0.412</b> | 16.301 |

OC-6: Octahedron; TPR-6: Trigonal prism; PPY-6: Pentagonal pyramid.



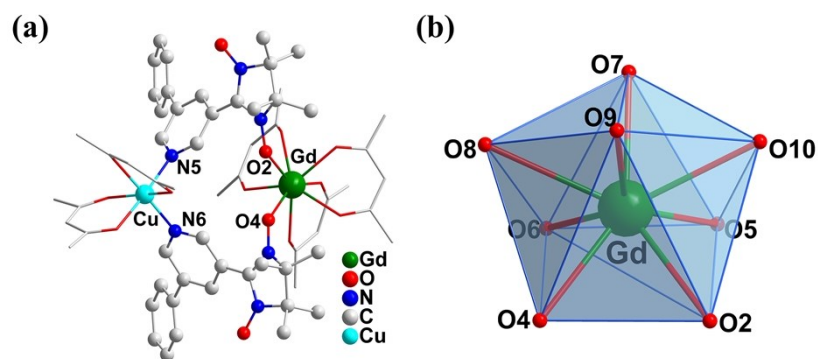

**Fig. S1** (a) The dinuclear structure of complex **1**. H and F atoms are not shown for the sake of clarity. (b) The coordination polyhedron of Gd<sup>III</sup> ion.

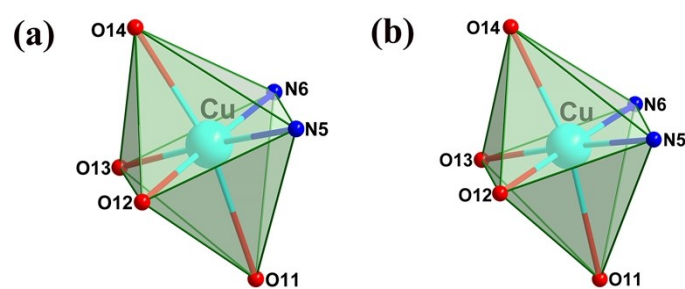

**Fig. S2** Coordination polyhedrons of the Cu ions in complex **1** (a) and complex **2** (b).

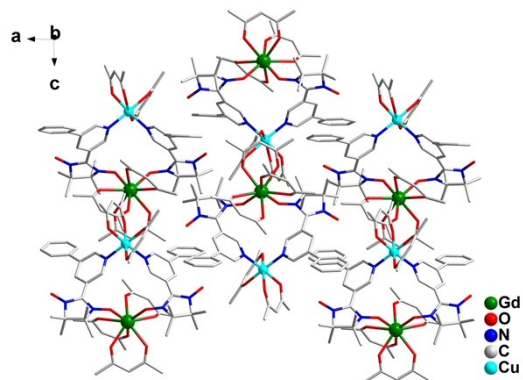

**Fig. S3** Packing diagram of **1** (H and F atoms are omitted for clarity).

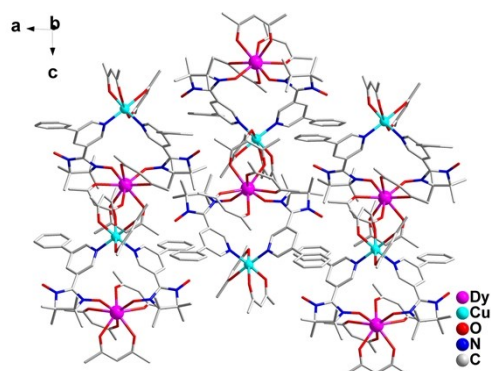

**Fig. S4** Packing diagram of **2** (H and F atoms are omitted for clarity).

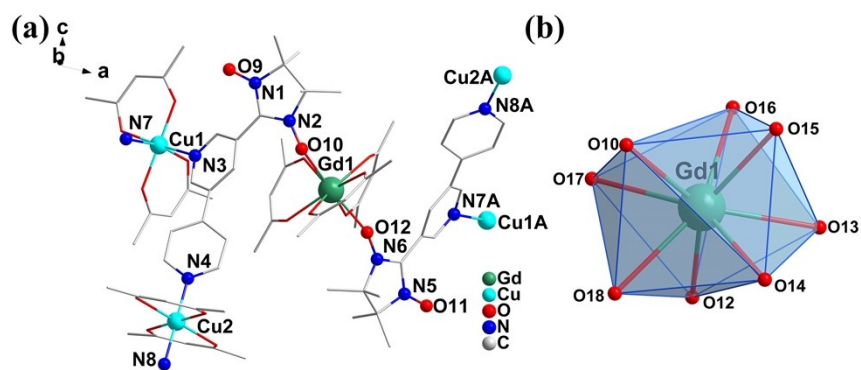

**Fig. S5** (a) The asymmetric unit found in complex **3**. H and F atoms are not shown for the sake of clarity. (b) The coordination polyhedron of Gd<sup>III</sup> ion.

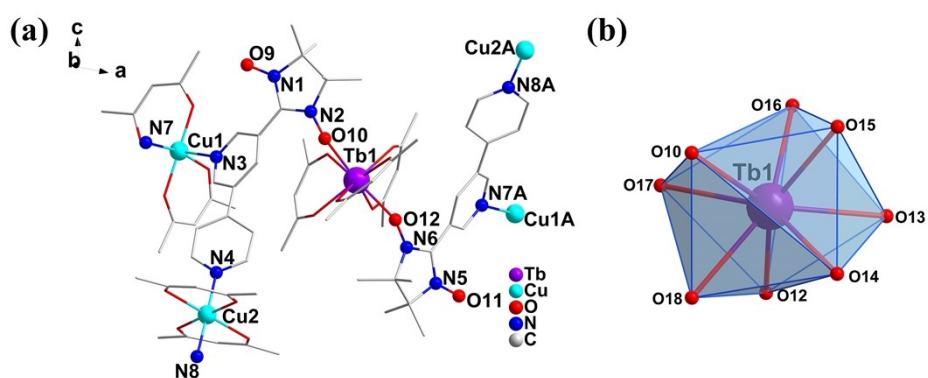

**Fig. S6** (a) The asymmetric unit found in complex **4**. H and F atoms are not shown for the sake of clarity. (b) The coordination polyhedron of Tb<sup>III</sup> ion.

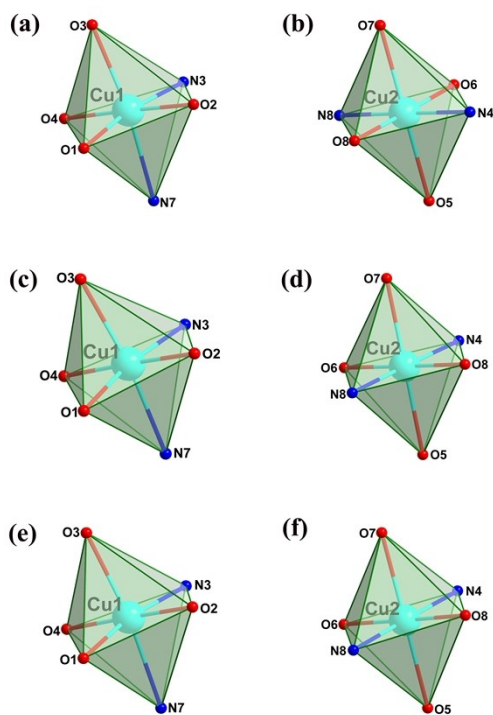

**Fig. S7** Coordination polyhedrons of Cu1 ion (a) and Cu2 ion (b) in complex **1**, Cu1 ion (c) and Cu2 ion (d) in complex **2** and Cu1 ion (e) and Cu2 ion (f) in complex **3**.

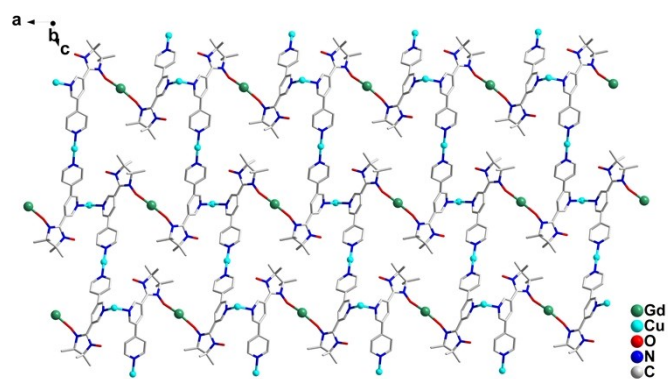

Fig. S8 2D structure of complex 3 (H atoms and hfac ligands are not shown for the sake of clarity).

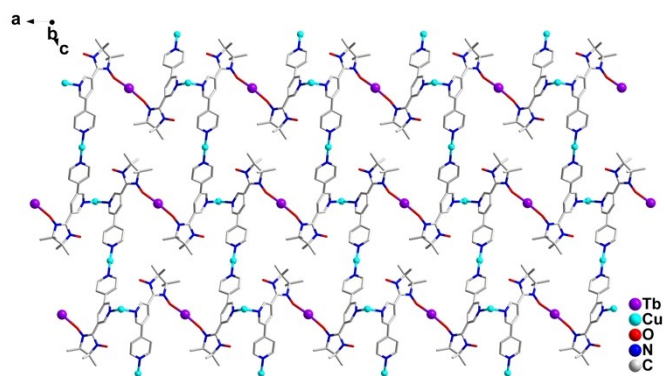

Fig. S9 2D structure of complex 4 (H atoms and hfac ligands are not shown for the sake of clarity).

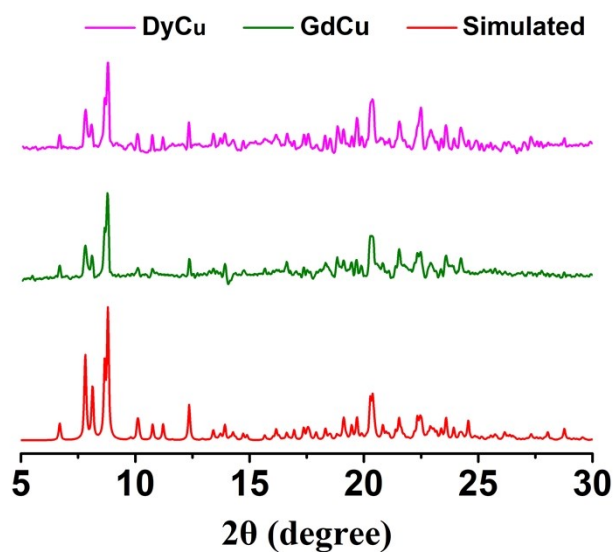

Fig. S10 Powder X-ray diffraction patterns of complexes 1 and 2.

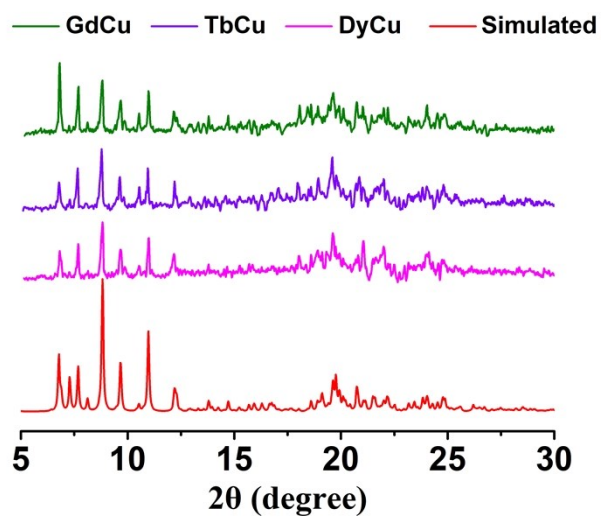

Fig. S11 Powder X-ray diffraction patterns of complexes 3–5.

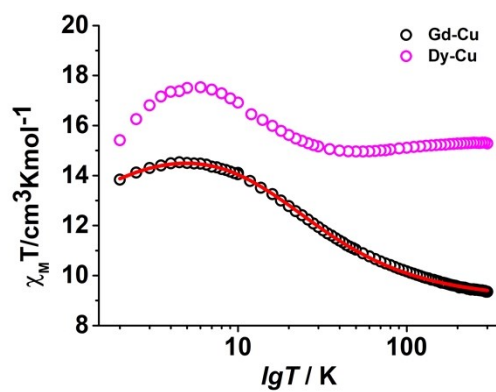

Fig. S12 Plot of  $\chi_M T$  versus  $\lg T$  for 1 and 2. The red line is the simulation curve by *PHI* for 1.

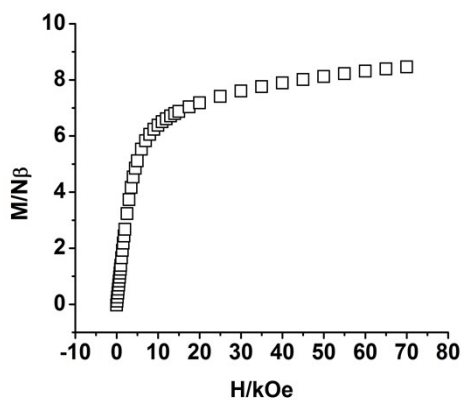

Fig. S13 Plot of magnetization vs field for 2 at 2 K.

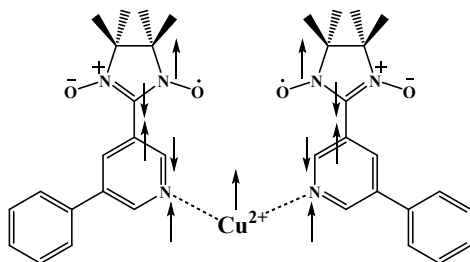

**Scheme S1.** Spin polarization mechanism for the magnetic coupling mediated by the *m*-pyridyl ring.

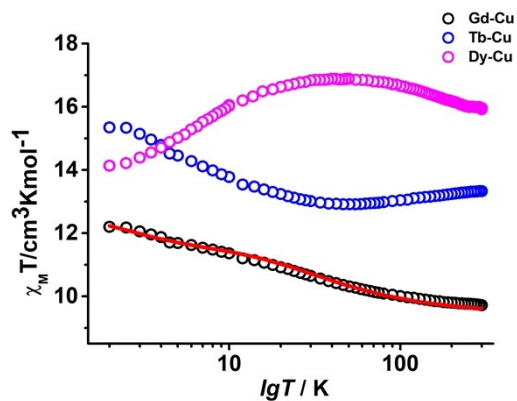

**Fig. S14** Plot of  $\chi_M T$  versus  $\lg T$  for **3–5**. The red line is the simulation curve by *PHI* for **3**.

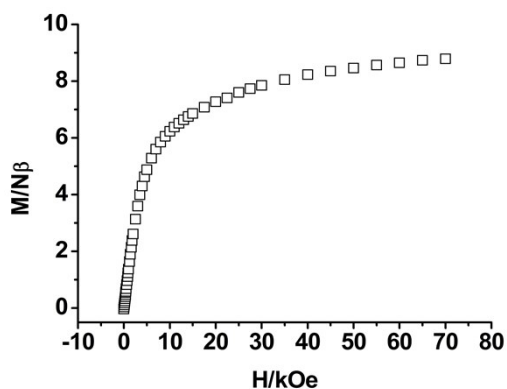

**Fig. S15** Plot of magnetization vs field for **4** at 2 K.

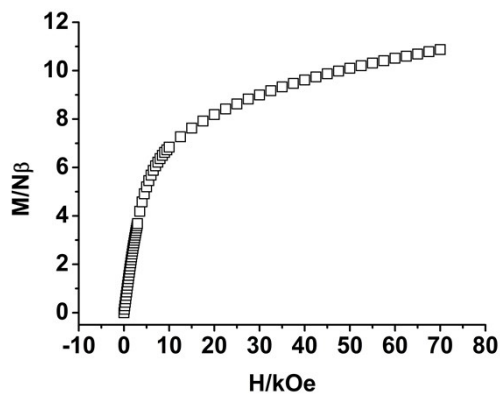

**Fig. S16** Plot of magnetization vs field for **5** at 2 K.

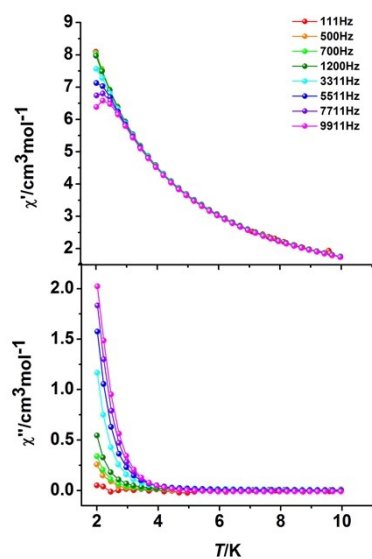

**Fig. S17** Temperature-dependent ac signals of the  $\chi'$  (top) and  $\chi''$  (bottom) under zero dc field for compound **2**.

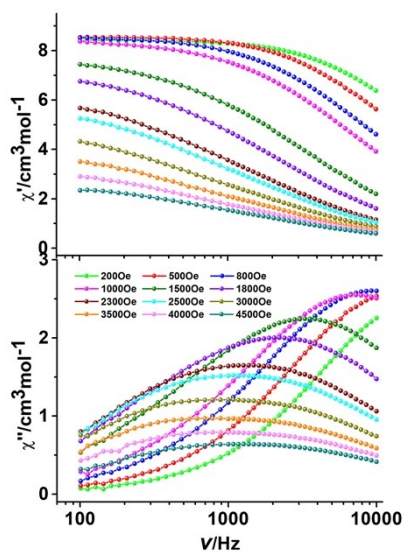

**Fig. S18** Frequency dependence of the  $\chi'$  (top) and  $\chi''$  (bottom) components of the ac susceptibility for **2** at 2 K under different dc fields.

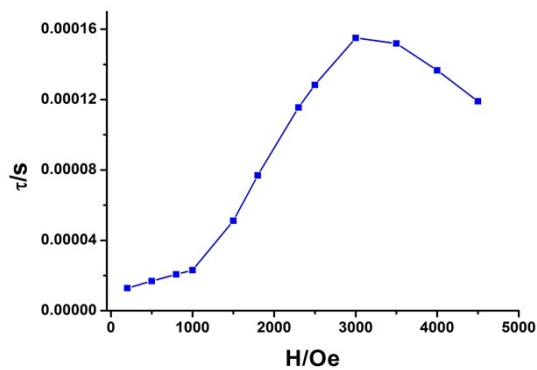

**Fig. S19** The  $\tau$  versus  $H$  plot for complex **2** at 2.0 K under the applied dc field.

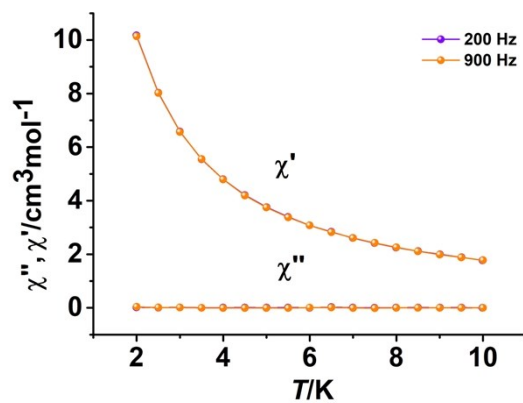

**Fig. S20** Temperature-dependent ac signals of the  $\chi'$  (top) and  $\chi''$  (bottom) under zero dc field for compound 4.

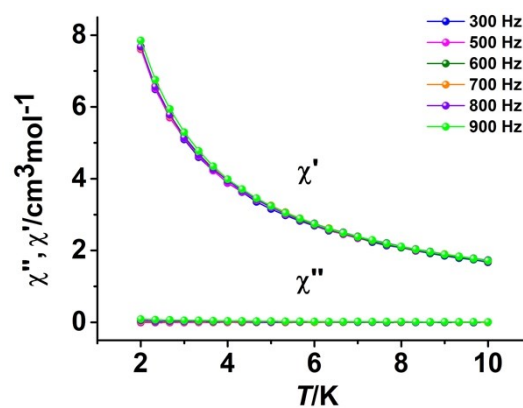

**Fig. S21** Temperature-dependent ac signals of the  $\chi'$  (top) and  $\chi''$  (bottom) under zero dc field for compound 5.

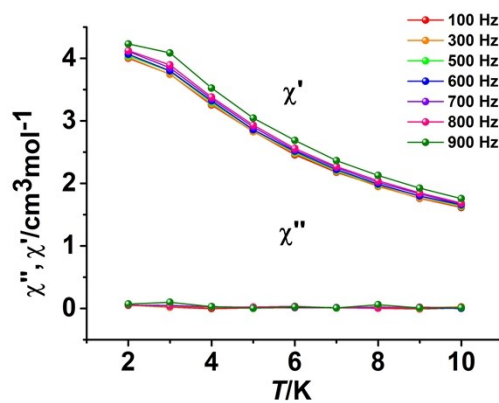

**Fig. S22** Temperature-dependent ac signals of the  $\chi'$  (top) and  $\chi''$  (bottom) under 3000 Oe dc field for compound 5.
